# Supplementary material for: Break-Induced Replication Is Highly Inaccurate
Source: PLoS Biol. 2011 Feb 15;9(2):e1000594. doi: 10.1371/journal.pbio.1000594 (PMC3039667; doi:10.1371/journal.pbio.1000594)
Supplement: Table S2 — BIR efficiency in wild type and mutant strains. (0.01 MB XLSX) [file pbio.1000594.s006.xlsx]

## Sheet: Table S2
Table S2. BIR efficiency in wild type and mutant strainsa
	BIR efficiency (%)b
	Median	CI or rangec [ # of repeats]
wt	77.5	(61.8 - 93.0) [7]
msh2D	82.5	(70.2 - 91.8) [7]
mlh1D	67.4	(47.0 - 74.0) [3]
pol3-5DV	67	(54.7 - 75.4) [9]
rev3D	70.4	(66.7 - 77.0) [5]
rad30D	71.4	(58.8 - 82.7) [6]
dun1D*	64	(53.7 - 69.2) [7]
sml1D*	69.1	(52.9 - 76.9) [13]
msh3D	81	(66.0 - 89.0) [5]
msh3Dpol3-5DV	71.5	(52.6 - 96.3) [6]
a Data shown represent combined data from strains with A4 at the 16- and 36-kb positions. b BIR efficiency of wild type and mutant strains was calculated as described in Materials and Methods. c For strains with ≥6 repetitions, 95% CI of the median is indicated. For strains with <6 repetitions, the median range is indicated. *Median is statistically significantly different from wild type (p<0.05)…
